# Supplementary material for: Increased macroH2A1.1 Expression Correlates with Poor Survival of Triple-Negative Breast Cancer Patients
Source: PubMed Central journal article supplement (PMC4049614; doi:10.1371/journal.pone.0098930), 2014-06-09
Supplement: pone.0098930.s005.pdf [file pone.0098930.s005.pdf]

|                    | E-TABM-157        |                  | E-MTAB-183        | E-TABM-827 [1] | GSE16795                | Miscellaneous                  | Synthesis |
|--------------------|-------------------|------------------|-------------------|----------------|-------------------------|--------------------------------|-----------|
| Reference          | Neve et al., [2]  | Prat et al., [3] | Lapuk et al., [4] | Synthesis      | Hollestelle et al., [5] | References                     |           |
| <b>Cell line</b>   |                   |                  |                   |                |                         |                                |           |
| <b>600MPE</b>      | Luminal           | Luminal          | Luminal           | -              | Luminal                 |                                | Luminal   |
| <b>AU565a</b>      | Luminal           | Luminal          | -                 | -              | -                       |                                | Luminal   |
| <b>BT474</b>       | Luminal           | Luminal          | Luminal           | -              | Luminal                 |                                | Luminal   |
| <b>BT483</b>       | Luminal           | Luminal          |                   | -              | Luminal                 |                                | Luminal   |
| <b>CAMA1</b>       | Luminal           | Luminal          | Luminal           | Luminal        | Luminal                 |                                | Luminal   |
| <b>EVSA-T</b>      | -                 | -                | -                 | -              | Luminal                 |                                | Luminal   |
| <b>HCC1007</b>     | Luminal           | Luminal          | -                 | -              | -                       |                                | Luminal   |
| <b>HCC1008</b>     | <i>Unassigned</i> | -                | -                 | -              | -                       | Luminal - Haughian et al., [6] | Luminal   |
| <b>HCC1419</b>     | -                 | -                | -                 | Luminal        | -                       | Luminal - Hoeflich et al., [7] | Luminal   |
| <b>HCC1428</b>     | Luminal           | Luminal          | -                 | -              | -                       |                                | Luminal   |
| <b>HCC202</b>      | Luminal           | Luminal          | -                 | -              | -                       |                                | Luminal   |
| <b>HCC2185</b>     | Luminal           | Luminal          | -                 | -              | -                       |                                | Luminal   |
| <b>HCC2218</b>     | -                 | -                | -                 | -              | -                       | Luminal - Hu et al., [8]       | Luminal   |
| <b>IBEP1</b>       | -                 | -                | -                 | Luminal        | -                       | Luminal - Buckley et al., [9]  | Luminal   |
| <b>KPL1</b>        | -                 | -                | -                 | Luminal        | -                       |                                | Luminal   |
| <b>LY2</b>         | Luminal           | Luminal          | -                 | -              | -                       |                                | Luminal   |
| <b>MCF7</b>        | Luminal           | Luminal          | Luminal           | Luminal        | Luminal                 |                                | Luminal   |
| <b>MDAMB134VI</b>  | Luminal           | Luminal          | -                 | Luminal        | Luminal                 |                                | Luminal   |
| <b>MDAMB175VII</b> | Luminal           | Luminal          | -                 | Luminal        | Luminal                 |                                | Luminal   |
| <b>MDAMB330</b>    | -                 | -                | -                 | -              | Luminal                 |                                | Luminal   |
| <b>MDAMB361</b>    | Luminal           | Luminal          | Luminal           | Luminal        | Luminal                 |                                | Luminal   |
| <b>MDAMB415</b>    | Luminal           | Luminal          | Luminal           | -              | Luminal                 |                                | Luminal   |
| <b>MDAMB453</b>    | Luminal           | Luminal          | Luminal           | Luminal        | Luminal                 |                                | Luminal   |
| <b>OCUB-F</b>      | -                 | -                | -                 | Luminal        | Luminal                 |                                | Luminal   |
| <b>SKBR3</b>       | Luminal           | Luminal          | Luminal           | Luminal        | Luminal                 |                                | Luminal   |
| <b>SK-BR-5</b>     | -                 | -                | -                 | -              | Luminal                 |                                | Luminal   |
| <b>SUM185PE</b>    | Luminal           | Luminal          | Luminal           | -              | Luminal                 |                                | Luminal   |
| <b>SUM44PE</b>     | Luminal           | Luminal          | -                 | -              | Luminal                 |                                | Luminal   |
| <b>SUM52PE</b>     | Luminal           | Luminal          | Luminal           | Luminal        | Luminal                 |                                | Luminal   |
| <b>T47D</b>        | Luminal           | Luminal          | Luminal           | Luminal        | Luminal                 |                                | Luminal   |
| <b>UACC812</b>     | Luminal           | Luminal          | -                 | -              | Luminal                 |                                | Luminal   |

NON  
CLAUDIN-  
LOW

| Data set         | E-TABM-157        |                  | E-MTAB-183        | E-TABM-827 [1] | GSE16795                | Miscellaneous                   | Synthesis |                                                               |
|------------------|-------------------|------------------|-------------------|----------------|-------------------------|---------------------------------|-----------|---------------------------------------------------------------|
| Reference        | Neve et al., [2]  | Prat et al., [3] | Lapuk et al., [4] | Synthesis      | Hollestelle et al., [5] | References                      |           |                                                               |
| <b>Cell line</b> |                   |                  |                   |                |                         |                                 |           |                                                               |
| UACC-893         | -                 | -                | -                 | -              | Luminal                 |                                 | Luminal   | NON<br>CLAUDIN-<br>LOW                                        |
| ZR751            | Luminal           | Luminal          | Luminal           | Luminal        | Luminal                 |                                 | Luminal   |                                                               |
| ZR7530           | Luminal           | Luminal          | -                 | Luminal        | Luminal                 |                                 | Luminal   |                                                               |
| ZR75B            | Luminal           | Luminal          | Luminal           | -              | -                       |                                 | Luminal   |                                                               |
| <b>N=</b>        | <b>27</b>         | <b>25</b>        | <b>13</b>         | <b>15</b>      | <b>23</b>               |                                 |           |                                                               |
| 184A1N4          |                   |                  | Basal             |                |                         |                                 | Basal     | NON<br>CLAUDIN-<br>LOW<br><br>*(except for<br>E-MTAB-<br>183) |
| 184B5            |                   |                  | Basal             |                |                         |                                 | Basal     |                                                               |
| BT20             | Basal A           | Basal A          | Basal             | BasalA         | Basal                   |                                 | Basal A   |                                                               |
| CAL-51           | -                 | -                | -                 | Basal B        | -                       | Basal B - Sharpe et al., [10]   | Basal B   |                                                               |
| DU4475           | <i>Unassigned</i> | -                | -                 | Basal          | <i>Unassigned</i>       | Basal A - Kuemmerle et al.,[11] | Basal A   |                                                               |
| GI-101           | -                 | -                | -                 | Basal          | -                       | Basal - Mackay et al., [12]     | Basal     |                                                               |
| HB4A             | -                 | -                | -                 | Basal          | -                       | Basal - Mackay et al., [12]     | Basal     |                                                               |
| HCC1143          | Basal A           | Basal A          | Basal             | Basal A        | -                       |                                 | Basal A   |                                                               |
| HCC1187          | Basal A           | Basal A          | Basal             | Basal A        | -                       |                                 | Basal A   |                                                               |
| HCC1500          | Basal B           | Basal B          | Basal             | Basal B        | -                       |                                 | Basal B   |                                                               |
| HCC1569          | Basal A           | Basal A          | -                 | -              | -                       |                                 | Basal A   |                                                               |
| HCC1599          | <i>Unassigned</i> | -                | -                 | Basal A        | -                       | Basal A - Hu et al.,[8]         | Basal A   |                                                               |
| HCC1806          | -                 | -                | -                 | Basal A        | -                       | Basal A - Hu et al., [8]        | Basal A   |                                                               |
| HCC1937          | Basal A           | Basal A          | -                 | BasalA         | Basal                   |                                 | Basal A   |                                                               |
| HCC1954          | Basal A           | Basal A          | Basal             | BasalA         | -                       |                                 | Basal A   |                                                               |
| HCC2157          | Basal A           | Basal A          | -                 | -              | -                       |                                 | Basal A   |                                                               |
| HCC3153          | Basal A           | Basal A          | Basal             | -              | -                       |                                 | Basal A   |                                                               |
| HCC38            | Basal B           | Basal B          | Claudin-low*      | BasalB         | -                       |                                 | Basal B   |                                                               |
| HCC70            | Basal A           | Basal A          | -                 | -              | -                       |                                 | Basal A   |                                                               |
| MCF10A           | Basal B           | Basal B          | Basal             | -              | -                       |                                 | Basal B   |                                                               |
| MCF10F           |                   |                  | Basal             |                |                         |                                 | Basal     |                                                               |
| MCF12A           | Basal B           | Basal B          | Basal             | -              | -                       |                                 | Basal B   |                                                               |
| MDAMB468         | Basal A           | Basal A          | -                 | Basal A        | Basal                   |                                 | Basal A   |                                                               |
| PMC42            | -                 | -                | -                 | Basal          | -                       | Basal - Mackay et al.,[12]      | Basal     |                                                               |
| SK-BR-7          | -                 | -                | -                 | Basal          | Basal                   |                                 | Basal     |                                                               |
| SUM102PT         | -                 | -                | -                 | -              | Basal                   | Basal A - Heiser et al.,[13]    | Basal A   |                                                               |

| Data set         | E-TABM-157       |                  | E-MTAB-183        | E-TABM-827 [1] | GSE16795                | Miscellaneous                    | Synthesis   |                        |
|------------------|------------------|------------------|-------------------|----------------|-------------------------|----------------------------------|-------------|------------------------|
| Reference        | Neve et al., [2] | Prat et al., [3] | Lapuk et al., [4] | Synthesis      | Hollestelle et al., [5] | References                       |             |                        |
| <b>Cell line</b> |                  |                  |                   |                |                         |                                  |             |                        |
| SUM149PT         | Basal B          | Basal B          | -                 | Basal B        | Basal                   |                                  | Basal B     | NON<br>CLAUDIN-<br>LOW |
| SUM190PT         | Basal A          | Basal A          | -                 | Basal A        | -                       |                                  | Basal A     |                        |
| SUM225CWN        | Basal A          | Basal A          | -                 | -              | -                       |                                  | Basal A     |                        |
| SUM229PE         | -                | -                | -                 | -              | Basal                   | Basal - Mirzoeva et al.,[14]     | Basal       |                        |
| VP229            | -                | -                | -                 | Basal          | -                       | Basal - Brough et al.,[15]       | Basal       |                        |
| <b>N=</b>        | <b>19</b>        | <b>17</b>        | <b>11</b>         | <b>19</b>      | <b>8</b>                |                                  |             |                        |
| BT549            | Basal B          | Claudin-low      | Claudin-low       | Claudin-low    | Basal                   |                                  | Claudin-low | CLAUDIN-<br>LOW        |
| HBL100           | Basal B          | Claudin-low      | Claudin-low       | -              | -                       |                                  | Claudin-low |                        |
| HCC1395          | -                | -                | -                 | Claudin-low    | -                       | Claudin-low - Heiser et al.,[13] | Claudin-low |                        |
| HS578T           | Basal B          | Claudin-low      | -                 | Claudin-low    | Basal                   |                                  | Claudin-low |                        |
| MDAMB157         | Basal B          | Claudin-low      | Claudin-low       | Claudin-low    | Basal                   |                                  | Claudin-low |                        |
| MDAMB231         | Basal B          | Claudin-low      | Claudin-low       | -              | Basal                   |                                  | Claudin-low |                        |
| MDAMB435s        | Basal B          | Claudin-low      | Claudin-low       | Claudin-low    | Basal                   |                                  | Claudin-low |                        |
| MDAMB436         | Basal B          | Claudin-low      | -                 | Claudin-low    | Basal                   |                                  | Claudin-low |                        |
| SUM1315MO2       | Basal B          | Claudin-low      | -                 | -              | Basal                   |                                  | Claudin-low |                        |
| SUM159PT         | Basal B          | Claudin-low      | Claudin-low       | Claudin-low    | Basal                   |                                  | Claudin-low |                        |
| <b>N=</b>        | <b>9</b>         | <b>9</b>         | <b>6</b>          | <b>7</b>       | <b>8</b>                |                                  |             |                        |

- Holland DG, Burleigh A, Git A, Goldgraben MA, Perez-Mancera PA, et al. (2011) ZNF703 is a common Luminal B breast cancer oncogene that differentially regulates luminal and basal progenitors in human mammary epithelium. *EMBO Mol Med* 3: 167-180.
- Neve RM, Chin K, Fridlyand J, Yeh J, Baehner FL, et al. (2006) A collection of breast cancer cell lines for the study of functionally distinct cancer subtypes. *Cancer Cell* 10: 515-527.
- Prat A, Parker JS, Karginova O, Fan C, Livasy C, et al. (2010) Phenotypic and molecular characterization of the claudin-low intrinsic subtype of breast cancer. *Breast Cancer Res* 12: R68.
- Lapuk A, Marr H, Jakkula L, Pedro H, Bhattacharya S, et al. (2010) Exon-level microarray analyses identify alternative splicing programs in breast cancer. *Mol Cancer Res* 8: 961-974.
- Hollestelle A, Nagel JH, Smid M, Lam S, Elstrodt F, et al. (2010) Distinct gene mutation profiles among luminal-type and basal-type breast cancer cell lines. *Breast Cancer Res Treat* 121: 53-64.
- Haughian JM, Pinto MP, Harrell JC, Bliesner BS, Joensuu KM, et al. (2012) Maintenance of hormone responsiveness in luminal breast cancers by suppression of Notch. *Proc Natl Acad Sci U S A* 109: 2742-2747.
- Hoeflich KP, Merchant M, Orr C, Chan J, Den Otter D, et al. (2012) Intermittent administration of MEK inhibitor GDC-0973 plus PI3K inhibitor GDC-0941 triggers robust apoptosis and tumor growth inhibition. *Cancer Res* 72: 210-219.
- Hu Z, Huang G, Sadanandam A, Gu S, Lenburg ME, et al. (2010) The expression level of HJURP has an independent prognostic impact and predicts the sensitivity to radiotherapy in breast cancer. *Breast Cancer Res* 12: R18.

9. Buckley NE, Conlon SJ, Jirstrom K, Kay EW, Crawford NT, et al. (2011) The DeltaNp63 proteins are key allies of BRCA1 in the prevention of basal-like breast cancer. *Cancer Res* 71: 1933-1944.
10. Sharpe R, Pearson A, Herrera-Abreu MT, Johnson D, Mackay A, et al. (2011) FGFR signaling promotes the growth of triple-negative and basal-like breast cancer cell lines both in vitro and in vivo. *Clin Cancer Res* 17: 5275-5286.
11. Kuemmerle NB, Rysman E, Lombardo PS, Flanagan AJ, Lipe BC, et al. (2011) Lipoprotein lipase links dietary fat to solid tumor cell proliferation. *Mol Cancer Ther* 10: 427-436.
12. Mackay A, Tamber N, Fenwick K, Iravani M, Grigoriadis A, et al. (2009) A high-resolution integrated analysis of genetic and expression profiles of breast cancer cell lines. *Breast Cancer Res Treat* 118: 481-498.
13. Heiser LM, Sadanandam A, Kuo WL, Benz SC, Goldstein TC, et al. (2012) Subtype and pathway specific responses to anticancer compounds in breast cancer. *Proc Natl Acad Sci U S A* 109: 2724-2729.
14. Mirzoeva OK, Das D, Heiser LM, Bhattacharya S, Siwak D, et al. (2009) Basal subtype and MAPK/ERK kinase (MEK)-phosphoinositide 3-kinase feedback signaling determine susceptibility of breast cancer cells to MEK inhibition. *Cancer Res* 69: 565-572.
15. Brough R, Frankum JR, Sims D, Mackay A, Mendes-Pereira AM, et al. (2011) Functional viability profiles of breast cancer. *Cancer Discov* 1: 260-273.
