# Supplementary material for: Increased macroH2A1.1 Expression Correlates with Poor Survival of Triple-Negative Breast Cancer Patients
Source: PLoS One. 2014 Jun 9;9(6):e98930. doi: 10.1371/journal.pone.0098930 (PMC4049614; doi:10.1371/journal.pone.0098930)
Supplement: Table S2 — Selected GEO dataset for cell lines analysis. (XLSX) [file pone.0098930.s006.xlsx]

## Sheet: E-TABM-157
			macroH2A1.1	macroH2A1	macroH2A1	macroH2A1	macroH2A1.1/macroH2A1 mRNA Ratio
Cell line	Molecular subtype	Molecular subtype	214500_at	214501_s_at	207168_s_at	MOY (214501_s_at; 207168_s_at)
600MPE	Luminal	Non Claudin-low	6.9127	8.9896	9.7132	9.3514	-2.4387
AU565	Luminal	Non Claudin-low	3.9088	7.8112	9.2157	8.51345	-4.60465
BT474	Luminal	Non Claudin-low	5.9525	8.9651	9.8058	9.38545	-3.43295
BT483	Luminal	Non Claudin-low	4.9068	8.5736	10.4083	9.49095	-4.58415
CAMA1	Luminal	Non Claudin-low	5.3653	9.383	10.1884	9.7857	-4.4204
HCC1007	Luminal	Non Claudin-low	4.9683	8.5401	9.6697	9.1049	-4.1366
HCC1008	Luminal	Non Claudin-low	4.3458	8.0382	9.376	8.7071	-4.3613
HCC1428	Luminal	Non Claudin-low	4.3886	8.8933	9.886	9.38965	-5.00105
HCC202	Luminal	Non Claudin-low	4.9615	9.1677	9.828	9.49785	-4.53635
HCC2185	Luminal	Non Claudin-low	4.2806	8.8185	9.9455	9.382	-5.1014
LY2	Luminal	Non Claudin-low	4.6957	8.7303	9.7778	9.25405	-4.55835
MCF7	Luminal	Non Claudin-low	4.9893	8.9679	9.8884	9.42815	-4.43885
MDAMB134	Luminal	Non Claudin-low	8.0837	9.5186	10.36	9.9393	-1.8556
MDAMB175	Luminal	Non Claudin-low	5.1526	9.0931	10.1248	9.60895	-4.45635
MDAMB361	Luminal	Non Claudin-low	5.3829	9.0453	10.4519	9.7486	-4.3657
MDAMB415	Luminal	Non Claudin-low	4.8539	9.3253	10.4594	9.89235	-5.03845
MDAMB453	Luminal	Non Claudin-low	4.1731	8.9232	10.354	9.6386	-5.4655
SKBR3	Luminal	Non Claudin-low	4.5674	8.2071	9.3873	8.7972	-4.2298
SUM185PE	Luminal	Non Claudin-low	5.6747	9.0964	10.1126	9.6045	-3.9298
SUM44PE	Luminal	Non Claudin-low	6.0437	9.662	10.5424	10.1022	-4.0585
SUM52PE	Luminal	Non Claudin-low	6.3569	9.4747	10.3331	9.9039	-3.547
T47D	Luminal	Non Claudin-low	5.2004	9.0178	9.8908	9.4543	-4.2539
UACC812	Luminal	Non Claudin-low	5.3343	8.5202	9.9125	9.21635	-3.88205
ZR751	Luminal	Non Claudin-low	5.5404	8.7832	9.5639	9.17355	-3.63315
ZR7530	Luminal	Non Claudin-low	5.1173	9.3597	10.2576	9.80865	-4.69135
ZR75B	Luminal	Non Claudin-low	4.3175	9.2533	10.3428	9.79805	-5.48055
DU4475	Basal	Non Claudin-low	4.5954	9.3376	10.4952	9.9164	-5.321
BT20	Basal	Non Claudin-low	4.0759	8.613	9.8735	9.24325	-5.16735
HCC1143	Basal	Non Claudin-low	4.3843	7.8224	8.4591	8.14075	-3.75645
HCC1187	Basal	Non Claudin-low	5.3658	8.467	9.5333	9.00015	-3.63435
HCC1569	Basal	Non Claudin-low	5.1748	8.4279	9.3696	8.89875	-3.72395
HCC1599	Basal	Non Claudin-low	4.2511	8.1279	9.4111	8.7695	-4.5184
HCC1937	Basal	Non Claudin-low	5.7971	9.2809	10.1345	9.7077	-3.9106
HCC1954	Basal	Non Claudin-low	4.3941	8.6576	9.477	9.0673	-4.6732
HCC2157	Basal	Non Claudin-low	4.1058	9.0639	10.1564	9.61015	-5.50435
HCC3153	Basal	Non Claudin-low	5.7822	8.6375	9.564	9.10075	-3.31855
HCC70	Basal	Non Claudin-low	4.8026	8.5571	9.7087	9.1329	-4.3303
MDAMB468	Basal	Non Claudin-low	5.3471	9.0559	10.1382	9.59705	-4.24995
SUM190PT	Basal	Non Claudin-low	5.3881	8.9224	9.853	9.3877	-3.9996
SUM225CWN	Basal	Non Claudin-low	5.9981	8.9638	10.1001	9.53195	-3.53385
HCC1500	Basal	Non Claudin-low	5.5881	8.858	10.0595	9.45875	-3.87065
SUM149PT	Basal	Non Claudin-low	5.0878	8.6682	9.6182	9.1432	-4.0554
HCC38	Basal	Non Claudin-low	5.6161	8.2067	9.3085	8.7576	-3.1415
SUM1315	Basal	Claudin-low	8.7933	9.4478	10.2037	9.82575	-1.03245
BT549	Basal	Claudin-low	5.7205	8.1547	9.3666	8.76065	-3.04015
HBL100	Basal	Claudin-low	5.1487	8.316	9.2979	8.80695	-3.65825
HS578T	Basal	Claudin-low	7.0208	8.4765	9.4697	8.9731	-1.9523
MDAMB157	Basal	Claudin-low	5.0324	8.3798	9.3647	8.87225	-3.83985
MDAMB231	Basal	Claudin-low	7.223	8.726	9.8335	9.27975	-2.05675
MDAMB435	Basal	Claudin-low	4.9148	8.3421	9.139	8.74055	-3.82575
MDAMB436	Basal	Claudin-low	3.8376	7.7795	9.0127	8.3961	-4.5585
SUM159PT	Basal	Claudin-low	5.825	8.7786	9.5893	9.18395	-3.35895

## Sheet: E-TABM-827
			macroH2A1.1		macroH2A1		macroH2A1.1/macroH2A1 mRNA Ratio
Cell line	Molecular subtype	Molecular subtype	6620403	log2	5130451	log2	log2
CAMA1	Luminal	Non Claudin-low	263.9	8.04385	3317.2	11.6958	-3.6519
HCC1419	Luminal	Non Claudin-low	124.1	6.95536	3614.1	11.8194	-4.86406
IBEP1	Luminal	Non Claudin-low	54.8	5.7761	2106.3	11.0405	-5.26439
KPL1	Luminal	Non Claudin-low	1.9	0.925999	4863.9	12.2479	-11.3219
MCF7	Luminal	Non Claudin-low	57.9	5.85549	4670	12.1892	-6.33372
MCF7	Luminal	Non Claudin-low	52.6	5.71699	3806.1	11.8941	-6.17711
MDAMB134	Luminal	Non Claudin-low	840.6	9.71528	4324.2	12.0782	-2.36294
MDAMB175	Luminal	Non Claudin-low	205.3	7.68159	5238.9	12.355	-4.67346
MDAMB361	Luminal	Non Claudin-low	121.8	6.92837	4472.3	12.1268	-5.19843
MDAMB361	Luminal	Non Claudin-low	84.6	6.40259	3659.4	11.8374	-5.43481
MDAMB453	Luminal	Non Claudin-low	49	5.61471	3345.9	11.7082	-6.09347
OCUB-F	Luminal	Non Claudin-low	113.6	6.82782	1955.4	10.9332	-4.10543
SKBR3	Luminal	Non Claudin-low	32.7	5.03122	2787.6	11.4448	-6.41359
SUM52	Luminal	Non Claudin-low	434.3	8.76255	6178.5	12.593	-3.83049
SUMM44	Luminal	Non Claudin-low	78.7	6.29829	3343.9	11.7073	-5.40902
T47D	Luminal	Non Claudin-low	284.5	8.15228	4351	12.0871	-3.93485
ZR75-1	Luminal	Non Claudin-low	128	7	5205.8	12.3459	-5.3459
ZR75-30	Luminal	Non Claudin-low	46.8	5.54844	3375.1	11.7207	-6.17228
GI-101	Basal	Non Claudin-low	32.5	5.02237	1713.6	10.7428	-5.72045
HB4A	Basal	Non Claudin-low	159.4	7.31651	1545.7	10.594	-3.27754
PMC42	Basal	Non Claudin-low	94.6	6.56377	5058.3	12.3044	-5.74067
PMC42	Basal	Non Claudin-low	46.9	5.55152	3804.9	11.8936	-6.34213
PMC42	Basal	Non Claudin-low	58.3	5.86542	3635.6	11.828	-5.96255
PMC42	Basal	Non Claudin-low	64.5	6.01123	3469.8	11.7606	-5.74941
VP229	Basal	Non Claudin-low	139.1	7.11998	3625.8	11.8241	-4.70411
SKBR7	Basal	Non Claudin-low	159.3	7.3156	4057.9	11.9865	-4.67092
BT20	Basal A	Non Claudin-low	118.5	6.88874	4108.7	12.0045	-5.11572
BT20	Basal A	Non Claudin-low	94.2	6.55766	3465	11.7586	-5.20098
HCC1143	Basal A	Non Claudin-low	275.7	8.10696	4705.8	12.2002	-4.09327
HCC1187	Basal A	Non Claudin-low	249.4	7.96232	2558.9	11.3213	-3.35899
HCC1599	Basal A	Non Claudin-low	61.3	5.93782	3273.7	11.6767	-5.73889
HCC1806	Basal A	Non Claudin-low	86.1	6.42794	1911.2	10.9003	-4.47232
HCC1937	Basal A	Non Claudin-low	193.1	7.5932	2360.3	11.2048	-3.61155
HCC1954	Basal A	Non Claudin-low	165.7	7.37243	5368.9	12.3904	-5.01798
MDAMB468	Basal A	Non Claudin-low	184.8	7.52982	5027.4	12.2956	-4.76578
SUM190	Basal A	Non Claudin-low	225.8	7.8189	6481.3	12.6621	-4.84317
CAL51	Basal B	Non Claudin-low	82.5	6.36632	3878.8	11.9214	-5.55507
HCC1500	Basal B	Non Claudin-low	162.8	7.34696	8411.8	13.0382	-5.69124
HCC1500	Basal B	Non Claudin-low	169.3	7.40344	4344	12.0848	-4.68137
SUM149	Basal B	Non Claudin-low	146.7	7.19673	3352.3	11.7109	-4.51421
HCC38	Basal B	Non Claudin-low	34.1	5.0917	1991.1	10.9593	-5.86765
BT549	Claudin-low	Claudin-low	345.6	8.43296	2751.4	11.426	-2.99299
HCC1395	Claudin-low	Claudin-low	104.3	6.7046	1357.7	10.4069	-3.70235
Hs578T	Claudin-low	Claudin-low	457.7	8.83826	3761.1	11.8769	-3.03868
MDAMB157	Claudin-low	Claudin-low	184	7.52356	2817.2	11.46	-3.93648
MDAMB435	Claudin-low	Claudin-low	280.7	8.13289	3530.6	11.7857	-3.65281
MDAMB436	Claudin-low	Claudin-low	69.3	6.11478	3579.2	11.8054	-5.69064
SUM159	Claudin-low	Claudin-low	228.4	7.83542	2176.9	11.0881	-3.25264

## Sheet: GSE16795
							macroH2A1.1		macroH2A1		macroH2A1		macroH2A1	macroH2A1.1/macroH2A1 mRNA Ratio
ID_REF	Cell line	Molecular subtype	Molecular subtype	E-CADH	VIMENTIN	N-CADH	214500_at	log2	214501_s_at	log2	207168_s_at	log2	MOY (log2(214501_s_at); log2(207168_s_at))
GSM421883	SK-BR-3	Luminal	Non Claudin-low	-	-	-	25.9	4.69488	826.4	9.6907	1538.6	10.5874	10.139	-5.44417
GSM421870	MDA-MB-134VI	Luminal	Non Claudin-low	-	-	-	892.2	9.80122	1384.6	10.4353	3155.6	11.6237	11.0295	-1.22825
GSM421886	SUM44PE	Luminal	Non Claudin-low	-	n.d	n.d	76	6.24793	1931.2	10.9153	2829.3	11.4662	11.1908	-4.94283
GSM421898	ZR-75-30	Luminal	Non Claudin-low	-	-	-	72.4	6.17792	1057.1	10.0459	3152.7	11.6224	10.8341	-4.65622
GSM421879	MDA-MB-453	Luminal	Non Claudin-low	-	-	-	80.1	6.32373	1464.4	10.5161	2470.2	11.2704	10.8933	-4.56952
GSM421884	SK-BR-5	Luminal	Non Claudin-low	-	-	-	120.5	6.91289	2008.1	10.9716	3822.3	11.9002	11.4359	-4.52303
GSM421882	OCUB-F	Luminal	Non Claudin-low	+	-	-	45.8	5.51728	701.7	9.45471	1498.1	10.5489	10.0018	-4.48454
GSM421881	MPE600	Luminal	Non Claudin-low	+	-	-	157.7	7.30104	1188.5	10.2149	2322.6	11.1815	10.6982	-3.39719
GSM421864	CAMA-1	Luminal	Non Claudin-low	+	-	-	174	7.44294	1991.6	10.9597	2762.6	11.4318	11.1958	-3.75282
GSM421866	EVSA-T	Luminal	Non Claudin-low	+	-	-	297.4	8.21626	1888.1	10.8827	2955.5	11.5292	11.206	-2.98969
GSM421891	SUM185PE	Luminal	Non Claudin-low	+	-	-	66.5	6.05528	1628.9	10.6697	2606.4	11.3478	11.0088	-4.95348
GSM421897	ZR-75-1	Luminal	Non Claudin-low	+	-	-	67.8	6.08321	1504.2	10.5548	2877.8	11.4908	11.0228	-4.93955
GSM421887	SUM52PE	Luminal	Non Claudin-low	+	-	-	95.6	6.57894	1758.1	10.7798	3084	11.5906	11.1852	-4.60626
GSM421872	MDA-MB-175VII	Luminal	Non Claudin-low	+	-	-	79.7	6.31651	1193.5	10.221	2231.9	11.1241	10.6725	-4.35601
GSM421896	UACC893	Luminal	Non Claudin-low	+	-	-	67.9	6.08534	956.5	9.90162	1947.5	10.9274	10.4145	-4.32917
GSM421869	MCF7	Luminal	Non Claudin-low	+	-	-	109.2	6.77083	1514.7	10.5648	3128	11.611	11.0879	-4.31709
GSM421862	BT483	Luminal	Non Claudin-low	+	-	-	100.2	6.64674	1358.1	10.4074	2886.8	11.4953	10.9513	-4.30458
GSM421894	T47D	Luminal	Non Claudin-low	+	-	-	100.7	6.65392	1251	10.2889	2478.5	11.2753	10.7821	-4.12814
GSM421895	UACC812	Luminal	Non Claudin-low	+	-	-	117.9	6.88142	1364.1	10.4137	2854.8	11.4792	10.9465	-4.06503
GSM421874	MDA-MB-330	Luminal	Non Claudin-low	+	n.d	n.d	112.3	6.81121	1171.2	10.1938	2524.2	11.3016	10.7477	-3.93648
GSM421875	MDA-MB-361	Luminal	Non Claudin-low	+	-	-	133.8	7.06393	1294.7	10.3384	2465	11.2674	10.8029	-3.73895
GSM421861	BT474	Luminal	Non Claudin-low	+	-	-	199.7	7.64169	1576.1	10.6221	3507.9	11.7764	11.1993	-3.55758
GSM421876	MDA-MB-415	Luminal	Non Claudin-low	+	-	-	303.2	8.24413	2344.2	11.1949	4117.9	12.0077	11.6013	-3.35716
GSM421888	SUM102PT	Basal A	Non Claudin-low	n.d	n.d	n.d	524.1	9.0337	1484.8	10.5361	2408.2	11.2337	10.8849	-1.8512
GSM421860	BT20	Basal A	Non Claudin-low	+	-	-	41.5	5.37504	1229.4	10.2637	2094.9	11.0327	10.6482	-5.27316
GSM421865	DU4475	Basal A	Non Claudin-low	+	-	-	120.3	6.91049	2801.8	11.4521	3762.2	11.8774	11.6647	-4.75426
GSM421880	MDA-MB-468	Basal A	Non Claudin-low	+	-	-	79.2	6.30743	1329.9	10.3771	2009.2	10.9724	10.6748	-4.36733
GSM421867	HCC1937	Basal A	Non Claudin-low	+	n.d	n.d	106.4	6.73335	1093.9	10.0953	2435.5	11.25	10.6726	-3.93928
GSM421889	SUM149PT	Basal B	Non Claudin-low	+	-	+	85.1	6.41109	1142	10.1573	1897	10.8895	10.5234	-4.11234
GSM421892	SUM229PE	Basal B	Non Claudin-low	+	+	-	123.2	6.94486	1352	10.4009	2441.8	11.2537	10.8273	-3.88245
GSM421885	SK-BR-7	Basal B	Non Claudin-low	+	+	-	153	7.25739	681.8	9.4132	1532.3	10.5815	9.99734	-2.73996
GSM421877	MDA-MB-435s	Claudin-low	Claudin-low	-	+	-	19.5	4.2854	347	8.43879	565.5	9.14338	8.79109	-4.50569
GSM421878	MDA-MB-436	Claudin-low	Claudin-low	-	+	+	46.4	5.53605	617.3	9.26983	1639.6	10.6791	9.97448	-4.43843
GSM421871	MDA-MB-157	Claudin-low	Claudin-low	-	+	+	169.4	7.40429	779.8	9.60696	1737.5	10.7628	10.1849	-2.78059
GSM421893	SUM1315MO2	Claudin-low	Claudin-low	-	n.d	n.d	158.2	7.30561	579.5	9.17866	1236	10.2715	9.72506	-2.41946
GSM421873	MDA-MB-231	Claudin-low	Claudin-low	-	+	-	395.6	8.6279	1194.7	10.2224	2578.2	11.3321	10.7773	-2.14939
GSM421890	SUM159PT	Claudin-low	Claudin-low	-	+	+	278	8.11894	628.9	9.29669	1775.7	10.7942	10.0454	-1.92649
GSM421863	BT549	Claudin-low	Claudin-low	-	+	+	371.2	8.53605	742.7	9.53664	1446.4	10.4983	10.0174	-1.48139
GSM421868	Hs578T	Claudin-low	Claudin-low	-	+	+	382.1	8.57781	583.3	9.18809	1278.4	10.3201	9.75411	-1.1763

## Sheet: E-MTAB-183
			Exon 1	Exon 1 / Exon 9	Exon 2	Exon 2	MOY Exon 2	Moy Exon 2 / Exon 9	Exon 3	Exon 3	MOY Exon 3	Moy Exon 3 / Exon 9	Exon 4	Exon 4 / Exon 9	Exon 5	Exon 5 / Exon 9	Exon 6a - macroH2A1.2	Exon 6a / Exon 9	Exon 6b - macroH2A1.1	Exon 6b / Exon 9	Exon 7	Exon 7 / Exon 9	Exon 9	Exon 9	MOY Exon 9
Cell line	Molecular Subtype	Molecular Subtype	PSR050010954_st		JUC0500098915_st	PSR050010953_st			PSR050010952_st	PSR050010952_x_st			PSR050010951_st		PSR050010948_st		PSR050010944_st		PSR050010942_st		PSR050010940_st		PSR050010937_st	PSR050010938_st
600MPE	Luminal	Non Claudin-low	8.94839	-3.07912	10.2769	11.1177	10.6973	-1.33021	10.1541	10.7702	10.4621	-1.56537	10.3703	-1.65719	10.473	-1.55454	11.2254	-0.802155	9.15476	-2.87276	12.0668	0.039325	11.8387	12.2163	12.0275
BT474	Luminal	Non Claudin-low	9.42498	-3.07583	10.2612	11.4244	10.8428	-1.65804	10.6303	11.0342	10.8322	-1.66856	10.9613	-1.5395	10.8707	-1.63013	11.5954	-0.90539	9.3392	-3.16161	12.4864	-0.01444	12.4017	12.5999	12.5008
CAMA1	Luminal	Non Claudin-low	9.2691	-3.2602	10.4869	11.5847	11.0358	-1.4935	10.6401	11.0616	10.8508	-1.67846	10.7367	-1.79262	10.9015	-1.62776	11.8165	-0.71275	9.0562	-3.4731	12.5647	0.03538	12.3559	12.7027	12.5293
MCF7	Luminal	Non Claudin-low	9.29647	-2.76272	10.1432	10.9125	10.5279	-1.53133	10.292	10.807	10.5495	-1.5097	10.4876	-1.57156	10.4938	-1.56541	11.3846	-0.674625	8.63355	-3.42563	12.1283	0.069145	11.7848	12.3336	12.0592
MDAMB361	Luminal	Non Claudin-low	9.17226	-3.21136	10.5127	11.461	10.9868	-1.3968	10.4689	10.9285	10.6987	-1.68489	10.7006	-1.68303	10.9522	-1.43138	11.5199	-0.86369	8.97019	-3.41343	12.5057	0.12211	12.1789	12.5883	12.3836
MDAMB415	Luminal	Non Claudin-low	9.42572	-3.17495	10.5778	11.589	11.0834	-1.51723	10.8264	11.2591	11.0428	-1.55792	11.1302	-1.47049	11.0212	-1.57946	11.9919	-0.60876	9.3849	-3.21577	12.7027	0.10201	12.4027	12.7987	12.6007
MDAMB453	Luminal	Non Claudin-low	9.70948	-2.52684	10.3278	11.2621	10.7949	-1.4414	10.5116	11.0163	10.7639	-1.47238	10.7056	-1.53077	10.8506	-1.38568	11.6172	-0.61912	7.80743	-4.42889	12.3499	0.11357	11.9937	12.4789	12.2363
SKBR3	Luminal	Non Claudin-low	9.17484	-2.54748	10.1504	10.7589	10.4546	-1.2677	10.0557	10.4515	10.2536	-1.46871	10.0764	-1.64594	10.3288	-1.39349	10.9689	-0.75338	7.89005	-3.83227	11.843	0.12073	11.4947	11.95	11.7223
SUM185PE	Luminal	Non Claudin-low	9.55069	-2.48306	10.5738	11.4879	11.0308	-1.00294	10.5989	11.2094	10.9042	-1.12957	10.7138	-1.31992	10.9763	-1.05741	11.6314	-0.402315	8.3887	-3.64506	12.4949	0.461135	12.0867	11.9808	12.0338
SUM52PE	Luminal	Non Claudin-low	9.62668	-2.73922	10.8772	11.5126	11.1949	-1.171	10.8001	11.1607	10.9804	-1.38549	10.8401	-1.52583	11.0073	-1.35858	11.7241	-0.64185	9.2222	-3.1437	12.4627	0.09675	12.1115	12.6203	12.3659
T47D	Luminal	Non Claudin-low	9.31279	-3.02293	10.2202	11.2115	10.7158	-1.61989	10.4124	10.9185	10.6654	-1.67031	10.8489	-1.48681	10.7301	-1.60559	11.7529	-0.582795	8.7405	-3.59522	12.3749	0.039135	12.0782	12.5932	12.3357
ZR751	Luminal	Non Claudin-low	9.25141	-2.68503	9.89879	10.8497	10.3742	-1.56221	10.2732	10.6995	10.4863	-1.45012	10.4107	-1.52574	10.4093	-1.52717	11.4288	-0.507645	8.42657	-3.50987	12.0282	0.091765	11.5857	12.2872	11.9364
ZR75B	Luminal	Non Claudin-low	9.56815	-2.66007	10.3619	11.2674	10.8147	-1.41356	10.5013	10.9977	10.7495	-1.47873	10.7235	-1.50475	10.8314	-1.39681	11.6656	-0.562665	8.12731	-4.10092	12.332	0.103765	12.0433	12.4131	12.2282
184A1N4	Basal	Non Claudin-low	9.37183	-2.70579	10.3558	10.886	10.6209	-1.45672	10.2578	10.7297	10.4937	-1.58388	10.4785	-1.59915	10.4336	-1.64398	11.3921	-0.685515	7.92507	-4.15254	12.1308	0.053135	11.8739	12.2813	12.0776
184B5	Basal	Non Claudin-low	9.2163	-2.91288	10.42	11.2926	10.8563	-1.27287	10.3259	10.8578	10.5918	-1.53735	10.5193	-1.60991	10.5774	-1.55176	11.3461	-0.783075	8.55402	-3.57516	12.279	0.149775	11.8752	12.3832	12.1292
BT20	Basal	Non Claudin-low	8.92658	-3.08088	10.076	10.7195	10.3978	-1.60971	10.1146	10.5205	10.3175	-1.68995	10.2555	-1.75198	10.3222	-1.6853	11.3057	-0.701735	8.31489	-3.69258	12.044	0.036515	11.8213	12.1936	12.0075
HCC1143	Basal	Non Claudin-low	8.75976	-2.97058	10.1098	10.5166	10.3132	-1.41714	9.69519	10.1368	9.91599	-1.81435	9.92209	-1.80825	10.1787	-1.5516	10.9005	-0.82984	7.89874	-3.8316	11.7529	0.02253	11.5391	11.9215	11.7303
HCC1187	Basal	Non Claudin-low	8.69037	-3.33243	10.1183	10.9061	10.5122	-1.51059	10.1417	10.5646	10.3532	-1.66964	10.4252	-1.59761	10.3424	-1.68044	11.2715	-0.75128	9.07545	-2.94735	12.0688	0.04602	11.7785	12.267	12.0228
HCC1500	Basal	Non Claudin-low	9.2615	-2.86343	10.3251	11.1029	10.714	-1.41092	10.0915	10.7284	10.4099	-1.71498	10.3603	-1.76467	10.6919	-1.43307	11.1926	-0.932345	8.59104	-3.53389	12.1015	-0.023405	11.8996	12.3503	12.1249
HCC1954	Basal	Non Claudin-low	9.08863	-2.85737	10.2392	10.6985	10.4688	-1.47715	9.99491	10.7242	10.3596	-1.58645	10.2224	-1.72363	10.4419	-1.50415	10.9203	-1.02566	8.35157	-3.59444	11.9825	0.036485	11.7545	12.1375	11.946
HCC3153	Basal	Non Claudin-low	8.8056	-3.02742	10.0077	10.6235	10.3156	-1.51745	9.94367	10.3344	10.139	-1.69398	10.1401	-1.69296	10.2338	-1.59921	10.7854	-1.0476	8.74763	-3.0854	11.8259	-0.007085	11.6233	12.0427	11.833
MCF10A	Basal	Non Claudin-low	9.57351	-2.62575	10.3803	11.2147	10.7975	-1.40175	10.4931	11.2058	10.8494	-1.34985	10.7255	-1.4738	10.8069	-1.39234	11.456	-0.7433	8.32618	-3.87308	12.3244	0.12515	11.9719	12.4266	12.1993
MCF10F	Basal	Non Claudin-low	8.86474	-2.85428	10.2432	10.7059	10.4745	-1.24451	10.0408	10.5067	10.2737	-1.44527	10.0177	-1.70135	10.3535	-1.3655	10.8082	-0.91086	8.32612	-3.3929	11.8712	0.15216	11.4876	11.9504	11.719
MCF12A	Basal	Non Claudin-low	9.20954	-2.68131	10.3557	10.9785	10.6671	-1.22371	10.1693	10.6702	10.4198	-1.47109	10.3586	-1.53226	10.5397	-1.35115	11.0099	-0.88092	8.11858	-3.77226	11.9888	0.09794	11.6513	12.1304	11.8908
BT549	Claudin-low	Claudin-low	8.75032	-2.57206	9.97991	10.309	10.1445	-1.17792	9.61445	9.97817	9.79631	-1.52607	9.57979	-1.74259	9.88281	-1.43957	10.2472	-1.07519	8.77706	-2.54532	11.3633	0.04089	11.1129	11.5319	11.3224
HBL100	Claudin-low	Claudin-low	8.86804	-3.0116	10.0395	10.6714	10.3554	-1.52419	9.86355	10.3758	10.1197	-1.75997	10.2284	-1.65126	10.363	-1.5166	10.9469	-0.932695	8.58605	-3.29358	11.7516	-0.128035	11.603	12.1563	11.8796
HCC38	Claudin-low	Claudin-low	9.00553	-2.67639	9.99749	10.4539	10.2257	-1.45623	9.76461	10.308	10.0363	-1.6456	9.8859	-1.79601	9.94332	-1.73859	10.5458	-1.13607	8.82235	-2.85957	11.5606	-0.121275	11.3784	11.9854	11.6819
MDAMB157	Claudin-low	Claudin-low	8.78411	-2.89064	10.0718	10.4488	10.2603	-1.41444	9.76591	10.2933	10.0296	-1.64515	9.97331	-1.70145	10.0496	-1.62516	10.7027	-0.97206	8.71407	-2.96069	11.7126	0.03781	11.4295	11.92	11.6748
MDAMB231	Claudin-low	Claudin-low	9.32786	-2.68407	9.7282	10.6157	10.1719	-1.83999	10.3151	10.6282	10.4717	-1.54026	10.3029	-1.70908	10.3712	-1.64076	10.8584	-1.15355	9.85817	-2.15377	12.1079	0.09594	11.8135	12.2104	12.0119
MDAMB435	Claudin-low	Claudin-low	8.5721	-3.15416	10.1904	10.6854	10.4379	-1.28836	9.84543	10.3088	10.0771	-1.64913	10.0851	-1.64119	10.3094	-1.41685	10.9624	-0.763875	7.85725	-3.869	11.841	0.114705	11.5929	11.8596	11.7263
SUM159PT	Claudin-low	Claudin-low	9.13199	-2.86422	10.1293	10.9825	10.5559	-1.44032	10.0889	10.4616	10.2753	-1.72096	10.1988	-1.7974	10.3381	-1.65808	11.0043	-0.991925	9.49906	-2.49716	11.9111	-0.085075	11.8205	12.1719	11.9962

## Sheet: GSE9691
			macroH2A1.1	macroH2A1	macroH2A1	macroH2A1	macroH2A1.1/macroH2A1 mRNA Ratio
			214500_at	214501_s_at	207168_s_at	MOY (214501_s_at; 207168_s_at)
GSE9691	GSM245051	HMLE_shCntrl_rep1	7.29351	11.5826	12.3466	11.9646	-4.67107
GSE9691	GSM245052	HMLE_shCntrl_rep2	6.93305	11.5811	12.3554	11.9682	-5.0352
GSE9691	GSM245053	HMLE_shCntrl_rep3	7.13625	11.7572	12.3349	12.0461	-4.90981
GSE9691	GSM245054	HMLE_shEcad_rep1	8.65678	11.5119	12.1852	11.8485	-3.19176
GSE9691	GSM245055	HMLE_shEcad_rep2	8.72771	11.5227	12.2469	11.8848	-3.15708
GSE9691	GSM245056	HMLE_shEcad_rep3	8.58322	11.4506	12.1581	11.8043	-3.2211
GSE9691	GSM245060	HMLE_DNEcad_rep1	7.19333	11.5834	12.3935	11.9884	-4.7951
GSE9691	GSM245061	HMLE_DNEcad_rep2	7.31543	11.6209	12.5552	12.0881	-4.77263
GSE9691	GSM245062	HMLE_DNEcad_rep3	7.22838	11.5355	12.4653	12.0004	-4.77202

## Sheet: E-MTAB-884
		macroH2A1.1		macroH2A1		macroH2A1		macroH2A1	macroH2A1.1/macroH2A1 mRNA Ratio
		ILMN_1674034	log2	ILMN_1746171	log2	ILMN_2373495	log2	MOY (log2(ILMN_1746171); log2(ILMN_2373495))
E-MTAB-884	HMLE_shGFP	109.735	6.77788	716.294	9.48441	4882.94	12.2535	10.869	-4.09109
E-MTAB-884	HMLE_shGFP	166.327	7.37788	1163.05	10.1837	6026.64	12.5571	11.3704	-3.99254
E-MTAB-884	HMLE_shGFP	110.79	6.79168	835.066	9.70575	4169.28	12.0256	10.8657	-4.07398
E-MTAB-884	HMLE_shECad	304.891	8.25215	882.597	9.78561	4750.59	12.2139	10.9998	-2.7476
E-MTAB-884	HMLE_shECad	303.325	8.24472	1066.65	10.0589	5291.27	12.3694	11.2141	-2.96941
E-MTAB-884	HMLE_shECad	236.125	7.88341	764.866	9.57906	4464.21	12.1242	10.8516	-2.96822

## Sheet: GSE24202
		macroH2A1.1		macroH2A1		macroH2A1		macroH2A1	macroH2A1.1/macroH2A1 mRNA Ratio
		214500_at	log2	214501_s_at	log2	207168_s_at	log2	MOY (log2(214501_s_at); log2(207168_s_at))
GSM595326	HMLE, pWZL, rep1	511.624	8.99894	4093.07	11.999	5996.22	12.5498	12.2744	-3.27546
GSM595327	HMLE, pWZL, rep2	504.601	8.979	3939.44	11.9438	5779.51	12.4967	12.2203	-3.24125
GSM595328	HMLE, pWZL, rep3	427.37	8.73934	3888.81	11.9251	6638.7	12.6967	12.3109	-3.57156
GSM595329	HMLE, TGFb, rep1	392.767	8.61753	2787.39	11.4447	4487.25	12.1316	11.7882	-3.17063
GSM595330	HMLE, TGFb, rep2	341.655	8.4164	2559.2	11.3215	4450.88	12.1199	11.7207	-3.30428
GSM595331	HMLE, TGFb, rep3	356.136	8.47628	2801.89	11.4522	3996.8	11.9646	11.7084	-3.23212
GSM595332	HMLE, Twist, rep1	593.516	9.21314	2297.5	11.1658	3656.99	11.8364	11.5011	-2.288
GSM595333	HMLE, Twist, rep2	575.732	9.16925	2402.62	11.2304	4000.63	11.966	11.5982	-2.42895
GSM595334	HMLE, Twist, rep3	485.715	8.92397	2248.59	11.1348	4130.27	12.012	11.5734	-2.64945
GSM595335	HMLE, Gsc, rep1	572.257	9.16052	2761.72	11.4313	4164.15	12.0238	11.7276	-2.56706
GSM595336	HMLE, Gsc, rep2	679.728	9.40881	2628.32	11.3599	4330.58	12.0803	11.7201	-2.31132
GSM595337	HMLE, Gsc, rep3	650.285	9.34493	2812.22	11.4575	4398.27	12.1027	11.7801	-2.43518
GSM595338	HMLE, Snail, rep1	620.73	9.27782	2443.33	11.2546	4152.39	12.0197	11.6372	-2.35936
GSM595339	HMLE, Snail, rep2	526.116	9.03924	2549.03	11.3157	4121.49	12.0089	11.6623	-2.6231
GSM595340	HMLE, Snail, rep3	583.708	9.1891	2397.12	11.2271	3929.31	11.9401	11.5836	-2.39447
